# Supplementary material for: Multimodal Treatment with GEMOX Plus Helical Tomotherapy in Unresectable Locally Advanced Pancreatic Cancer: A Pooled Analysis of Two Phase 2 Studies
Source: MDPI journal article supplement (doi:10.3390/biom11081200), 2021-08-12
Supplement: s1 [file s1]

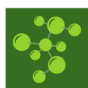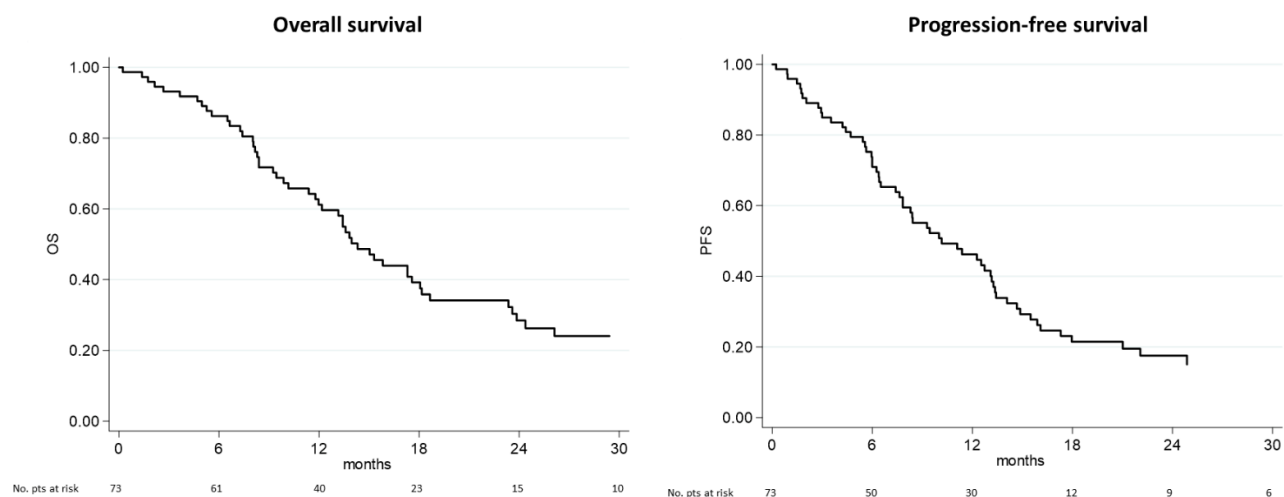

**Figure S1.** Kaplan-Meier analysis of overall and progression-free survival of the whole study population.

**Table S1.** Analysis of survival according to resection status.

|                           | patients ( <i>n</i> ) | deaths<br>( <i>n</i> ) | 1-year OS<br>(95% CI) | 2-year OS<br>(95% CI) | OS (months)<br>median (95% CI) | p     |
|---------------------------|-----------------------|------------------------|-----------------------|-----------------------|--------------------------------|-------|
| Overall cohort            |                       |                        |                       |                       |                                |       |
| Unresected                | 56                    | 44                     | 49 (35–62)            | 20 (8–32)             | 12.2 (9.2–15.0)                | 0.002 |
| Resected                  | 17                    | 9                      | 94 (83–100)           | 53 (27–79)            | 31.1 (17.3–nr)                 |       |
| Patients that received RT |                       |                        |                       |                       |                                |       |
| Unresected                | 40                    | 28                     | 61 (45–77)            | 26 (11–41)            | 13.8 (11.4–17.6)               | 0.029 |
| Resected                  | 16                    | 9                      | 94 (82–100)           | 52 (25–78)            | 31.1 (17.3–nr)                 |       |

CI, confidence interval; nr, not reached; OS, overall survival; RT, radiotherapy.
